# Supplementary material for: Non-stoichiometric defect-controlled reduction toward mixed-valence Mn-doped hexaaluminates and their optical applications
Source: Royal Society of Chemistry journal article supplement (doi:10.1039/c9tc01026b), 2019-01-01
Supplement: c9tc01026b1.pdf [file c9tc01026b1.pdf]

## Supporting Information

### Supporting Information

#### **Non-stoichiometric defect controlled reduction of mixed-valence Mn-doped hexaaluminates and the optical applications**

Jieqi Hu, Enhai Song\*, Yayun Zhou, Shaolin Zhang, Shi Ye, Zhiguo Xia and Qinyuan Zhang\*

**Table S1.** The synthesis information of Mn doped BAL(BAM) samples

| Number | Host lattice    | Mn Concentration | Mn Source         | Atmosphere                          |
|--------|-----------------|------------------|-------------------|-------------------------------------|
| A      | BAL             | 0.02             | MnCO <sub>3</sub> | air                                 |
| A      | BAL             | 0.02             | MnO <sub>2</sub>  | air                                 |
| A      | BAL             | 0.02             | KMnO <sub>4</sub> | air                                 |
| B      | BAL             | 0.02             | MnO <sub>2</sub>  | air                                 |
| B      | BAL             | 0.02             | MnO <sub>2</sub>  | 5%H <sub>2</sub> +95%N <sub>2</sub> |
| B      | BAL             | 0.02             | MnO <sub>2</sub>  | O <sub>2</sub>                      |
| C      | BAL             | 0.005-0.4        | MnO <sub>2</sub>  | air                                 |
| D      | (1-x)BAL-(x)BAM | 0.02             | MnO <sub>2</sub>  | air                                 |

**Table S2.** CIE coordinates of the spectra corresponding to Mn-doped (1-x)BAL-xBAM solid solution

| points | (1-x)BAL-xBAM | Excitation wavelength (nm) | CIE coordinates (x, y) |       |
|--------|---------------|----------------------------|------------------------|-------|
| 1      | x = 0         | 426                        | 0.106                  | 0.670 |
| 2      | x = 0.25      | 426                        | 0.112                  | 0.667 |
| 3      | x = 0.5       | 426                        | 0.121                  | 0.655 |
| 4      | x = 0.75      | 426                        | 0.165                  | 0.616 |
| 5      | x = 1         | 426                        | 0.488                  | 0.421 |
| 6      | x = 1         | 315                        | 0.714                  | 0.283 |

**Table S3.** RGB CIE coordinates of the NTSC standard and the fabricated white LED device

| Name       | R              | G              | B              |
|------------|----------------|----------------|----------------|
| NTSC       | (0.675, 0.303) | (0.110, 0.686) | (0.142, 0.062) |
| LED device | (0.670, 0.330) | (0.210, 0.710) | (0.140, 0.080) |

**Table S4.** The CIE coordinates of the BAM:Mn at different temperatures

| Temperature (°C) | CIE coordinates (x, y) |       |
|------------------|------------------------|-------|
| 30               | 0.381                  | 0.560 |
| 40               | 0.377                  | 0.563 |
| 50               | 0.375                  | 0.567 |
| 60               | 0.370                  | 0.569 |
| 70               | 0.364                  | 0.573 |
| 80               | 0.362                  | 0.574 |
| 90               | 0.358                  | 0.578 |
| 100              | 0.356                  | 0.579 |
| 110              | 0.346                  | 0.588 |
| 120              | 0.338                  | 0.594 |
| 130              | 0.329                  | 0.601 |
| 140              | 0.321                  | 0.607 |
| 150              | 0.305                  | 0.620 |
| 160              | 0.293                  | 0.630 |
| 170              | 0.277                  | 0.642 |
| 180              | 0.266                  | 0.652 |

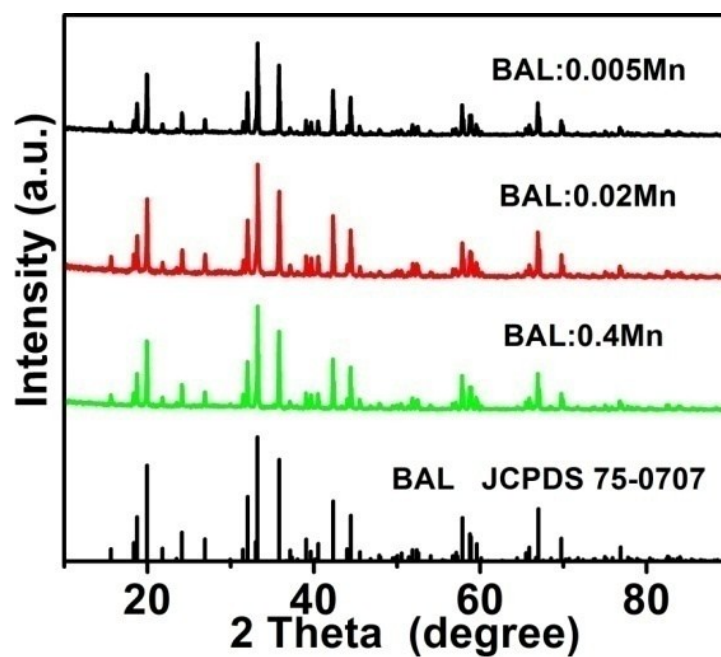

**Fig. S1** XRD patterns of BAL: $x$ Mn ( $x = 0.005, 0.02, 0.4$ ) samples and the standard pattern of BAL is given for comparison.

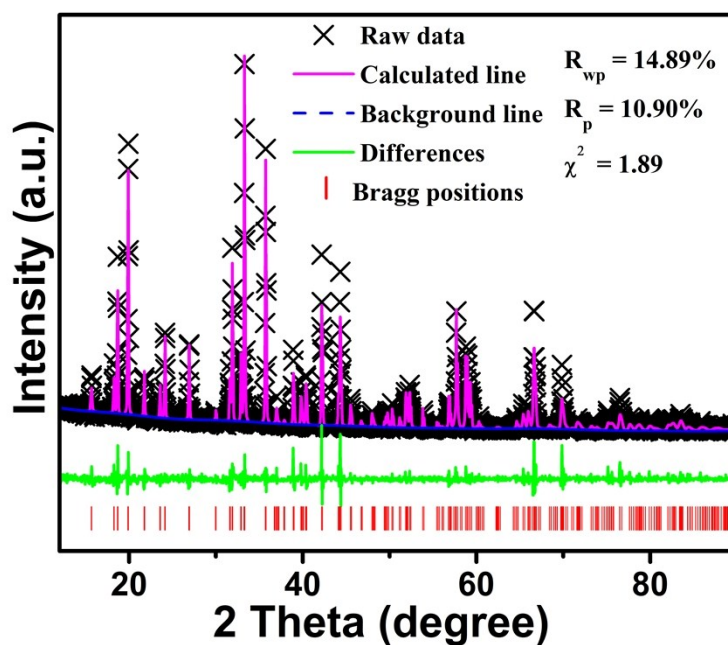

**Fig. S2** XRD Rietveld refinement for the representative 0.5BAL•0.5BAM.

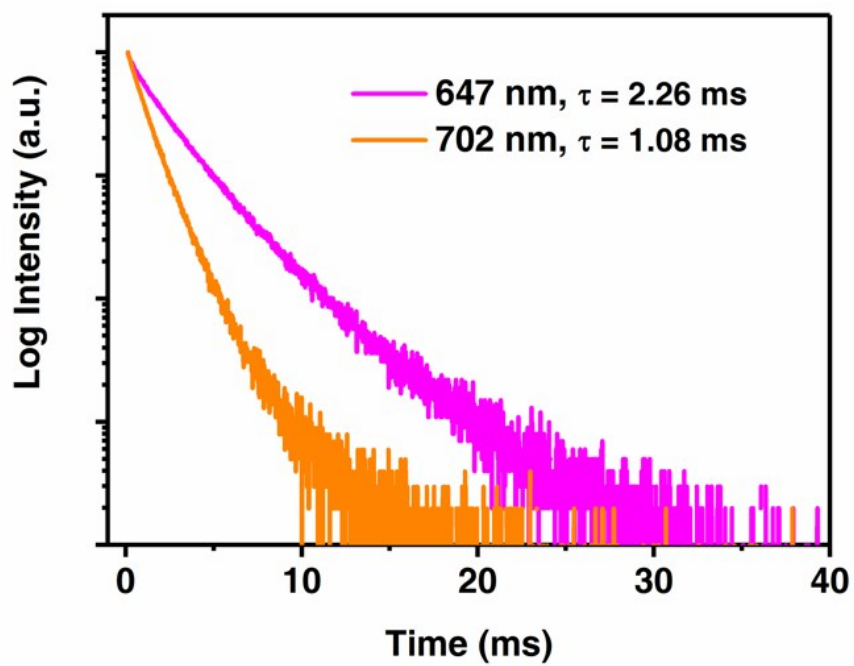

**Fig. S3** Luminescence decay curves and the corresponding emission lifetimes of emission peaks at 647 and 702 nm for the sample synthesized in O<sub>2</sub> atmosphere.

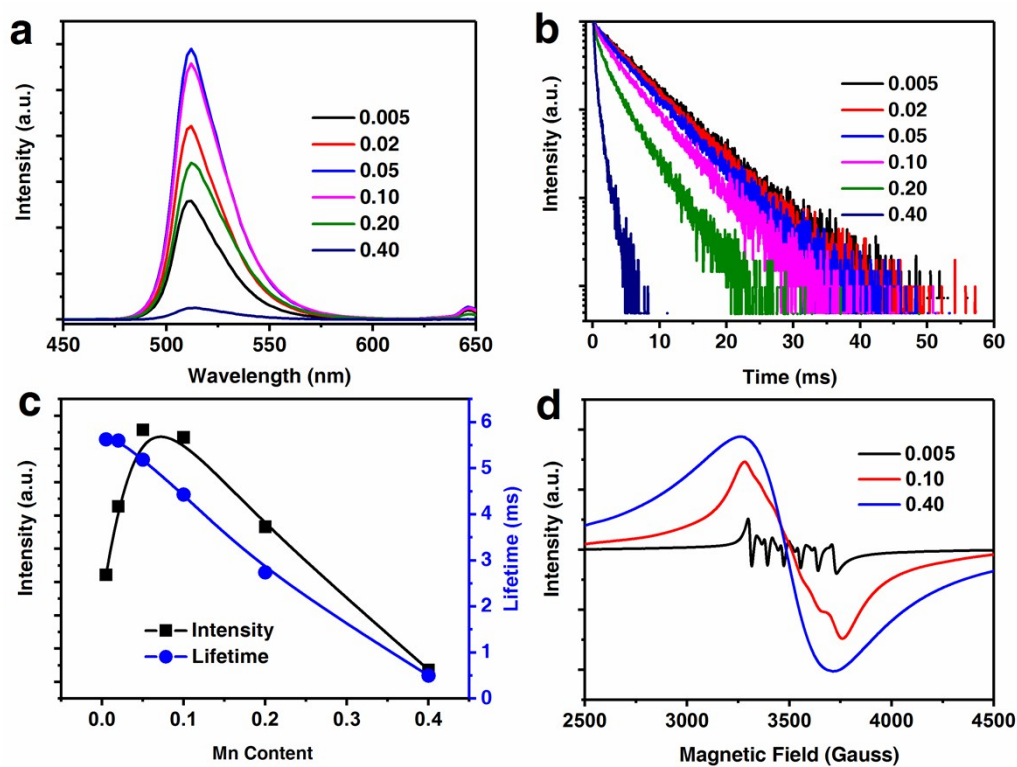

**Fig. S4** (a) Emission spectra ( $\lambda_{ex} = 426$  nm) of BAL:xMn ( $x = 0.005, 0.02, 0.05, 0.1, 0.2, 0.4$ ) prepared with MnO<sub>2</sub> in air and (b) their luminescence decay curves and (c) corresponding emission intensities and lifetimes. (d) EPR spectra of BAL:xMn ( $x = 0.005, 0.1, 0.4$ ) samples.
